# Supplementary material
Source: publisher site journal article supplement (https://www.dovepress.com/article/108599)
Supplement: Supplementary file 1 [file get_supplementary_file.php]

## **Supplementary materials**

### **Meta-analysis of the prognostic value of abnormally expressed lncRNAs in hepatocellular**

#### **Carcinoma**

Zhen Qu<sup>1&</sup>, Chun-Hui Yuan<sup>2&</sup>, Chang-Qing Yin<sup>1</sup>, Qing Guan<sup>2</sup>, Hao Chen<sup>1</sup>, Fu-Bing Wang<sup>1\*</sup>

<sup>1</sup> Department of Laboratory Medicine and Center for Gene Diagnosis, Zhongnan Hospital of Wuhan

University, <sup>2</sup> Department of Immunology, School of Basic Medical Sciences, Wuhan University, Wuhan,

People's Republic of China

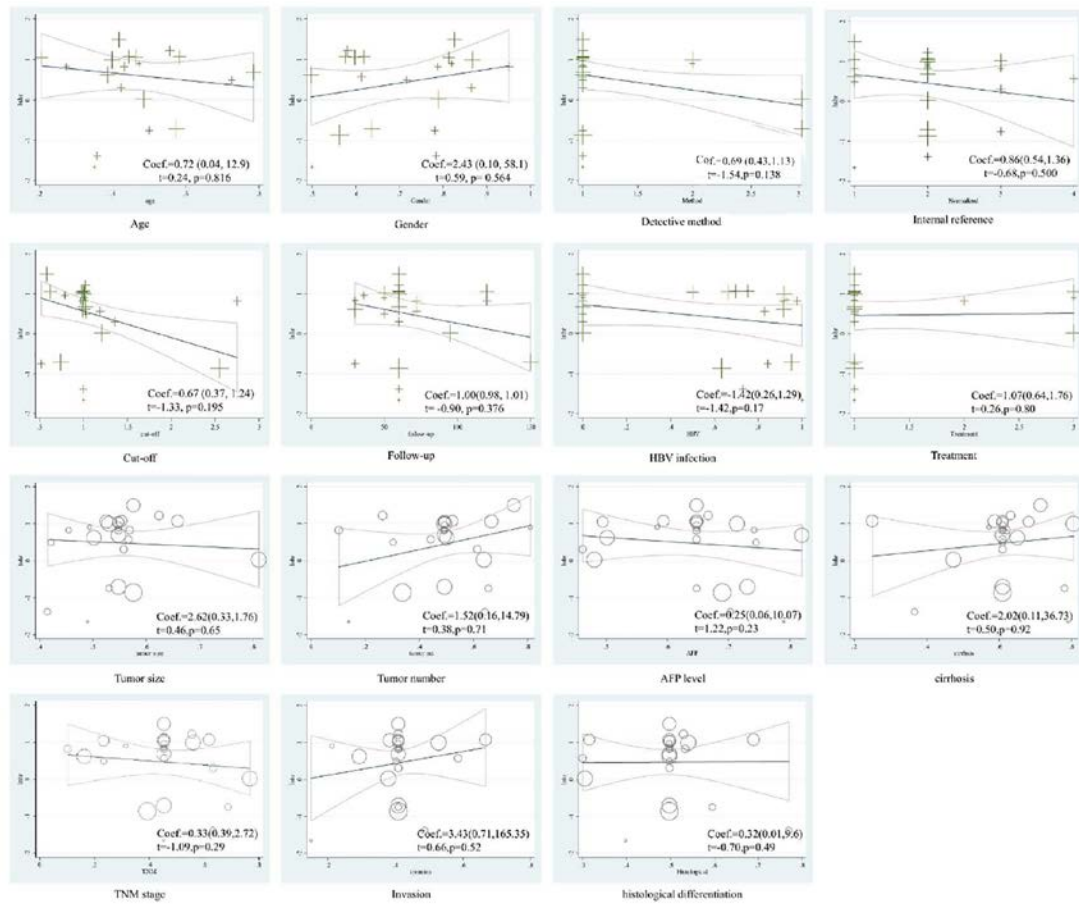

**Figure S1.** Meta-regression analyses were performed by the covariates to quantify the heterogeneity.

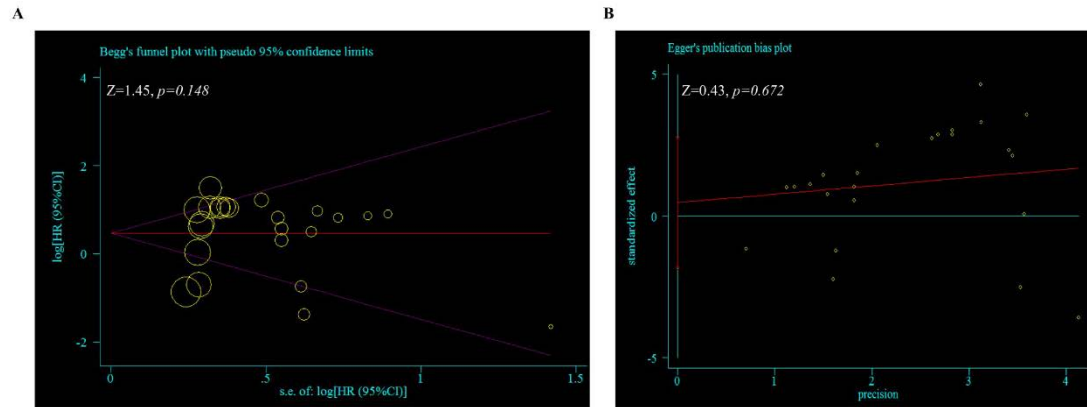

**Figure S2. Publication bias analysis of the association between lncRNAs expression and OS of HCC** were assessed by Begg's funnel plots and Egger's linear regression test. Begg's funnel plot (A) and Egger's linear regression test (B) of OS in patients with HCC. Log[HR], natural logarithm of HR; horizontal line mean magnitude of the effect. Each point represents a separate study for the indicated association. Note: A funnel plot with pseudo 95 % confidence limits was used.

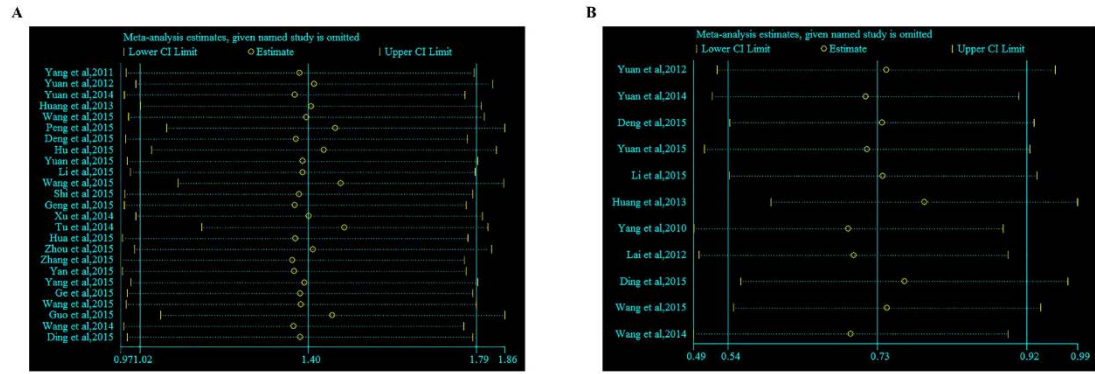

**Figure S3. Sensitivity analysis of the association between lncRNAs expression and OS/RFS of HCC.**

(A) Sensitivity analysis of the influence of each individual study on the pooled HRs of OS by omitting individual studies. (B) Sensitivity analysis of the influence of each individual study on the pooled HRs of RFS by omitting individual studies.

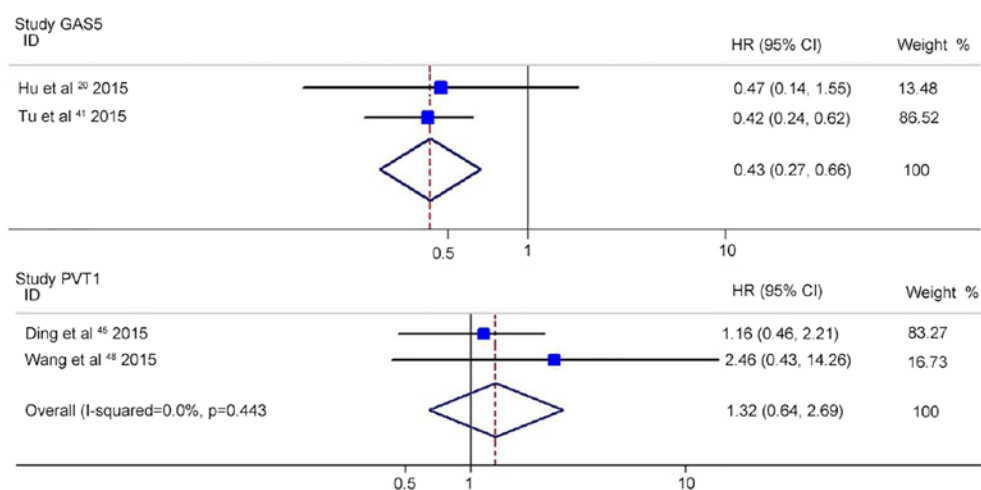

**Figure S4. Meta-analysis of the pooled HRs of OS for HCC patients with different types of lncRNA.**

(A) Meta-analysis of the pooled HRs of OS for HCC patients with increased GAS5 expression. (B) Meta-analysis of the pooled HRs of OS for HCC patients with increased PVT1 expression.
